# Supplementary material for: Fabrication of MoS2/WO3nanocomposite films for enhanced electro-chromic performance
Source: Royal Society of Chemistry journal article supplement (doi:10.1039/c7nj03011h), 2017-01-01
Supplement: c7nj03011h1.pdf [file c7nj03011h1.pdf]

## **Supporting Information**

### **Fabrication of MoS<sub>2</sub>/WO<sub>3</sub> Nanocomposite Film for Enhanced Electrochromic Performance**

**Md Rakibuddin and Haekyoung Kim\***

School of Materials Science and Engineering, Yeungnam University, Gyeongsan, 38541, Republic of Korea.

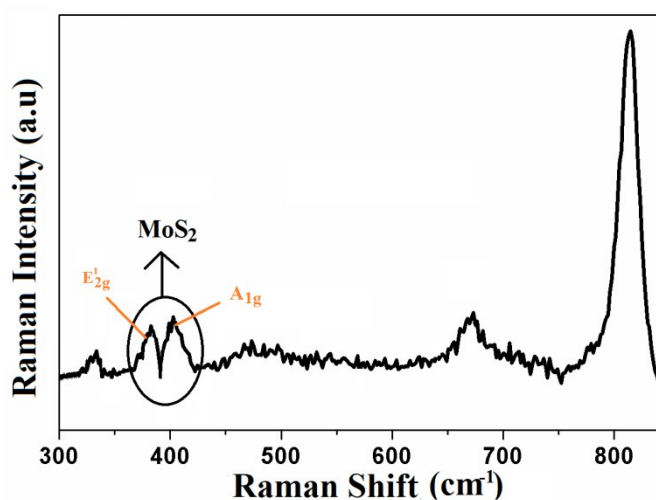

**Fig. S1** Raman spectrum of the MSW2.0 film

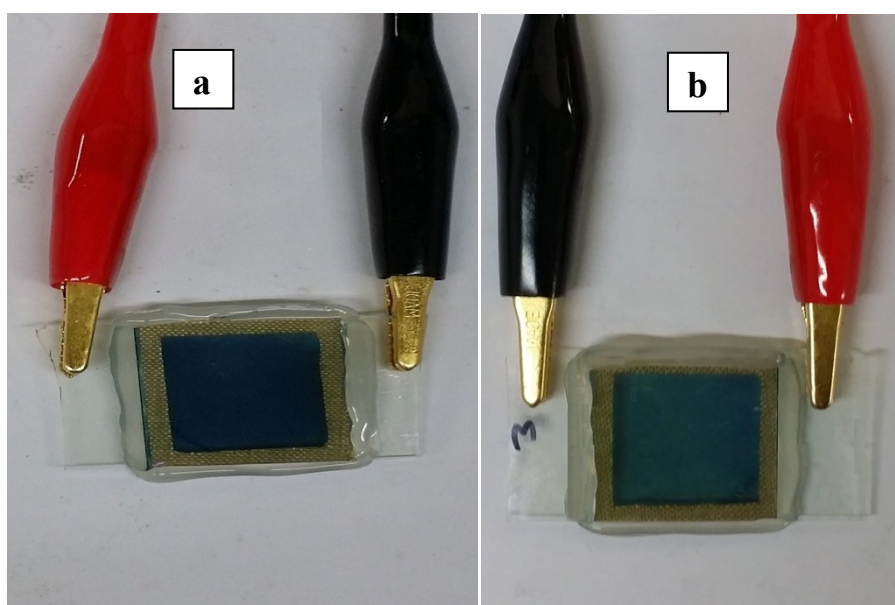

**Figure S2.** Comparison between the colored state of the ECDs for the a) MSW2.0 and b) pure WO<sub>3</sub> film.
